# Supplementary material for: Superior catalytic performance of intermetallic CaPt2nanoparticles supported on titanium group oxides in hydrogenation of ketones to alcohols
Source: Royal Society of Chemistry journal article supplement (doi:10.1039/d1cc07135a), 2022-01-01
Supplement: d1cc07135a1.pdf [file d1cc07135a1.pdf]

COMMUNICATION

**Electronic Supplementary Information**

**Superior Catalytic Performance of Intermetallic CaPt<sub>2</sub> Nanoparticles Supported on Titanium Group Oxides in Hydrogenation of Ketones to Alcohols**

Yasukazu Kobayashi,<sup>\*a</sup> Shohei Tada<sup>b</sup>, Masaru Kondo<sup>b</sup>, Kakeru Fujiwara<sup>c</sup> and Hiroshi Mizoguchi<sup>d</sup>

- <sup>a.</sup> *Interdisciplinary Research Center for Catalytic Chemistry, National Institute of Advanced Industrial Science and Technology (AIST), 1-1-1 Higashi, Tsukuba, Ibaraki 305-8565, Japan. E-mail: [yasu-kobayashi@aist.go.jp](mailto:yasu-kobayashi@aist.go.jp).*
- <sup>b.</sup> *Department of Materials Science and Engineering, Ibaraki University, 4-12-1 Nakanarusawacho, Hitachi, Ibaraki 316-8511, Japan.*
- <sup>c.</sup> *Department of Chemistry and Chemical Engineering, Yamagata University, 4-3-16 Jonan, Yonezawa-shi, Yamagata 992-8510, Japan.*
- <sup>d.</sup> *International Center for Materials Nanoarchitectonics (WPI-MANA), National Institute for Materials Science (NIMS), Tsukuba, Ibaraki 305-0044, Japan.*

## 1. Experimental

### 1.1. Density functional theory (DFT) periodic calculations

It was performed using the generalized gradient approximation, Perdew–Burke–Ernzerhof functional<sup>1</sup>, and the projected augmented plane wave method<sup>2</sup> implemented in the Vienna *Ab initio* simulation package (VASP)<sup>3</sup>. An energy cutoff of 600 eV and a  $10 \times 10 \times 10$  gamma-centered *k*-mesh were used. A Wigner–Seitz radius of 0.146 nm was used for the site projections of all the atoms. The atomic charges were estimated by Bader charge analysis<sup>4</sup>, and the crystal structures were visualized using the VESTA code<sup>5</sup>.

### 1.2. Characterization for the prepared samples

The crystal structures were investigated by X-ray diffraction (XRD, MiniFlex 600, Rigaku) with CuK $\alpha$  radiation generated at 40 kV and 15 mA. The porosity was examined by N<sub>2</sub> adsorption at –196 °C (BELLSORP mini-II, Microtrac-BEL). Before the measurement, the sample powder was pretreated at 150 °C for 30 min under a vacuum, and the contained water was removed. The morphology was observed by scanning electron microscopy (SEM, JSM-7000F, JEOL Ltd) and transmission electron microscopy (TEM, JEM-2100F, JEOL Ltd) with energy dispersive X-ray spectrometry (EDX) for elemental analysis. The molar ratio of Ca, Pt and Ti in CaPt<sub>2</sub>/TiO<sub>x</sub> was analyzed via X-ray fluorescence spectrometry (XRF, Rigaku, ZSX Primus II) at 50 kV and 60 mA.

### 1.3. Catalyst tests

Hydrogenation of cyclohexanone (0.15 mL, 1.45 mmol) using 5wt% of catalyst was performed in a batch reactor with 0.2 M solution in methanol (7.3 mL) at room temperature and 1 atm H<sub>2</sub> for 16 h. A commercial 3wt%Pt/C (54% water, Wako Pure Chem. Corp.) was used as reference. The turnover frequency (TOF) was calculated to compare the intrinsic catalytic performances based on the surface Pt site for 3wt%Pt/C and CaPt<sub>2</sub>/TiO<sub>x</sub>. The number of surface Pt sites was estimated from CO chemisorption experiments. After the catalyst was reduced at 300 °C under 5%H<sub>2</sub>/Ar flow at 50 mL/min for 1 h, several 10%CO/He pulses were dosed into the reduced catalyst at 40 °C to measure the adsorbed CO amount.

## References

1. J. P. Perdew, K. Burke and M. Ernzerhof, *Phys. Rev. Lett.*, 1996, **77**, 3865.
2. P. E. Blöchl, *Phys. Rev. B: Condens. Matter Mater. Phys.*, 1994, **50**, 17953.
3. G. Kresse and J. Furthmüller, *Phys. Rev. B: Condens. Matter Mater. Phys.*, 1996, **54**, 11169.
4. E. Sanville, S. Kenny, R. Smith and G. Henkelman, *J. Comput. Chem.*, 2007, **28**, 899.
5. K. Momma and F. Izumi, *J. Appl. Crystallogr.*, 2011, **44**, 1272.

**Table S1** Summary of the results of XRD, N<sub>2</sub> adsorption, XRF, SEM-/TEM-EDX for CaPt<sub>2</sub> supported on TiO<sub>x</sub>, ZrO<sub>x</sub> and HfO<sub>x</sub>.

| Sample                              | XRD measurements |                      |            | N <sub>2</sub> adsorption |                      | XRF                |    |    | SEM-/TEM-EDX |                            |                  |              |      |                     |                    |     |     |
|-------------------------------------|------------------|----------------------|------------|---------------------------|----------------------|--------------------|----|----|--------------|----------------------------|------------------|--------------|------|---------------------|--------------------|-----|-----|
|                                     | D <sup>a)</sup>  | Lattice constant [Å] |            | SA                        | Vp                   | Molar ratio [mol%] |    |    | Measurement  | Average molar ratio [mol%] |                  |              |      | Pt/Ca <sup>b)</sup> | O/Ti <sup>b)</sup> |     |     |
|                                     | [nm]             | Exp.                 | ICSD value | [m <sup>2</sup> /g]       | [cm <sup>3</sup> /g] | Ca                 | Pt | Ti |              | Ca                         | Pt               | Ti, Zr or Hf | O    | [mol/mol]           | [mol/mol]          |     |     |
| CaPt <sub>2</sub> /TiO <sub>x</sub> | 70               | 7.552                | 7.598      | 32                        | 0.02                 | 12                 | 29 | 59 | SEM          | 4.4                        | 12.4             | 13.9         | 69.6 | 3                   | -                  |     |     |
|                                     |                  |                      |            |                           |                      |                    |    |    |              | TEM                        | Pt-rich position | 14.7         | 59.5 | 11.4                | 14.4               | 4.3 | 3.1 |
|                                     |                  |                      |            |                           |                      |                    |    |    |              |                            | Ti-rich position | 1.7          | 0.3  | 43.9                | 54.1               | 0.2 | 1.3 |
| CaPt <sub>2</sub> /ZrO <sub>x</sub> | 60               | 7.565                |            | -                         | -                    | -                  |    |    | SEM          | 8.1                        | 18.4             | 1.3          | 72.2 | 3.3                 | -                  |     |     |
| CaPt <sub>2</sub> /HfO <sub>x</sub> | 60               | 7.573                |            | -                         | -                    | -                  |    |    | SEM          | 3.5                        | 35               | 14.7         | 46.8 | 10.1                | -                  |     |     |

a) Crystallite sizes were calculated by the Scherrer equation with a main peak at  $2\theta=20.3^\circ$ .

b) Average Pt/Ca and O/Ti molar ratios were calculated from a set of data described in **Table S2**.

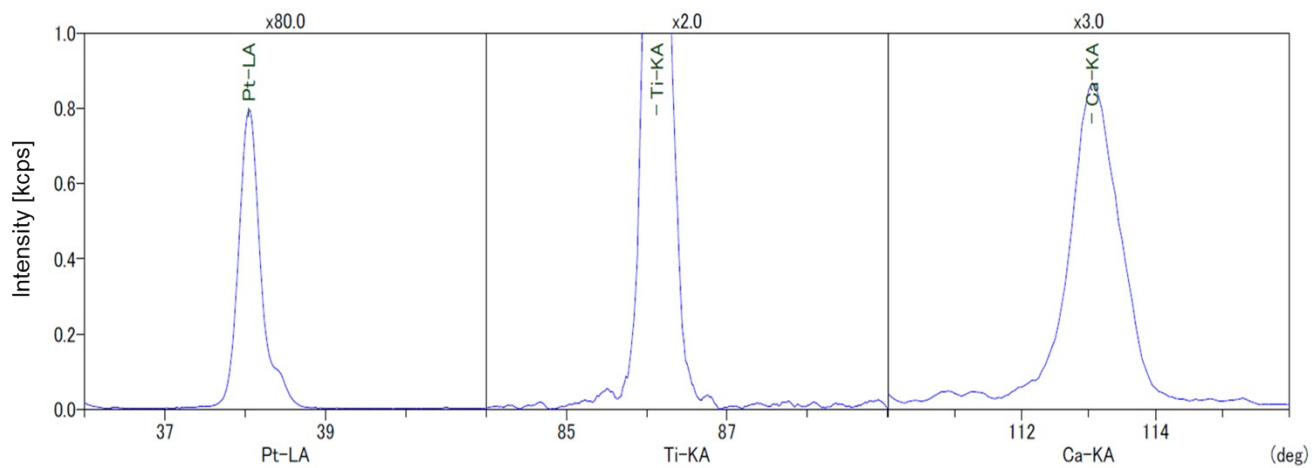

**Fig. S1** Spectra of Pt, Ti and Ca elements measured by XRF.

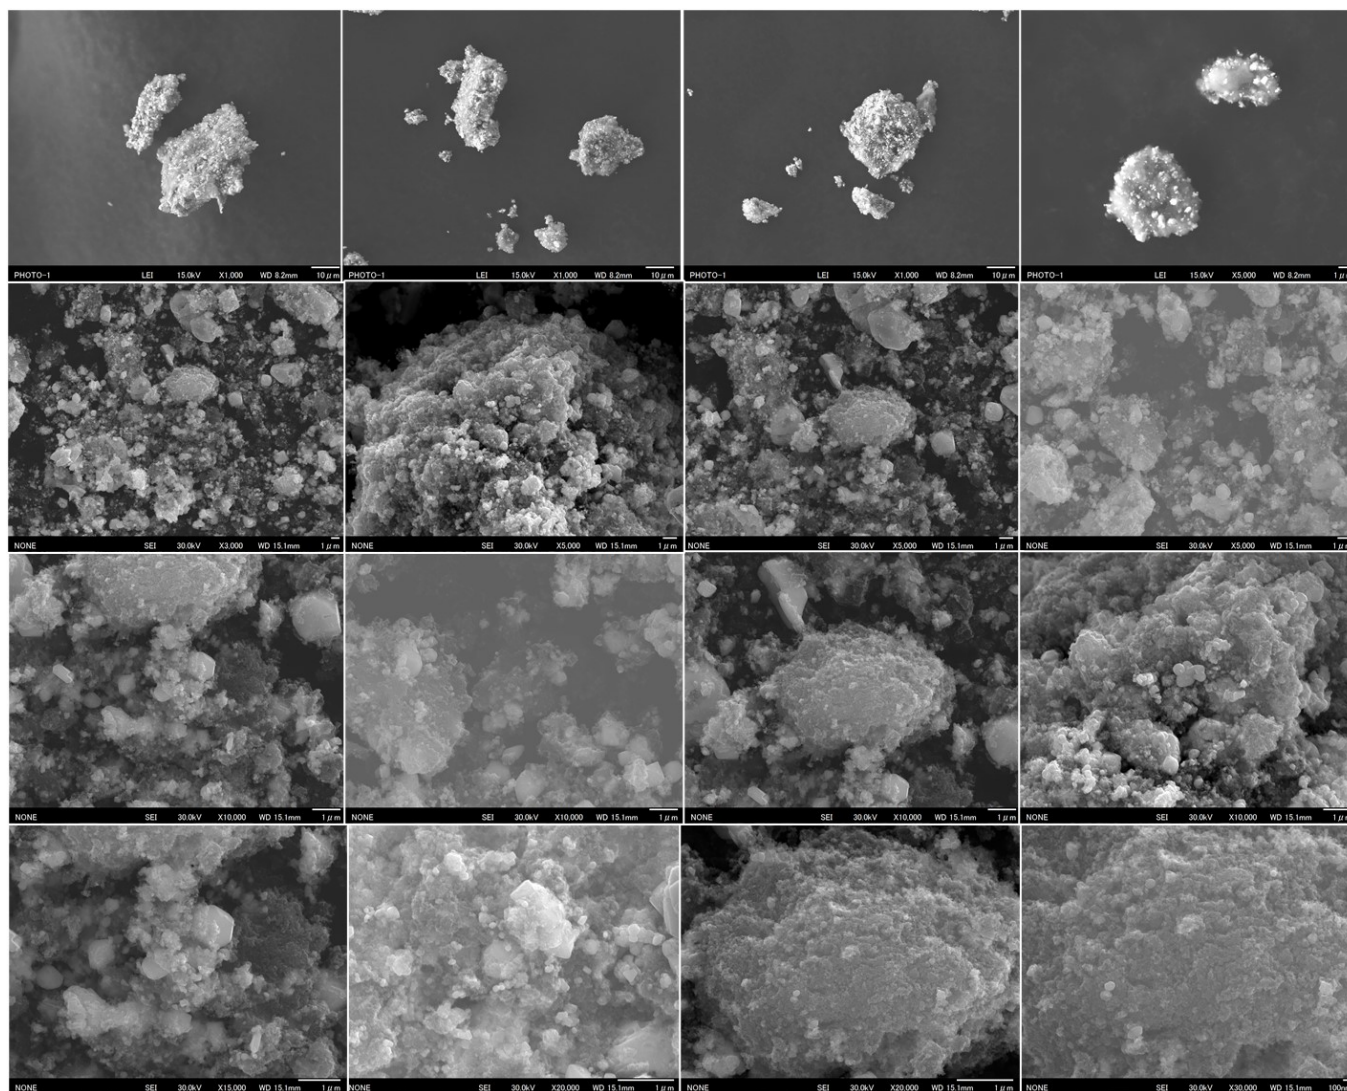

**Fig. S2** SEM images of CaPt<sub>2</sub>/TiO<sub>x</sub>.

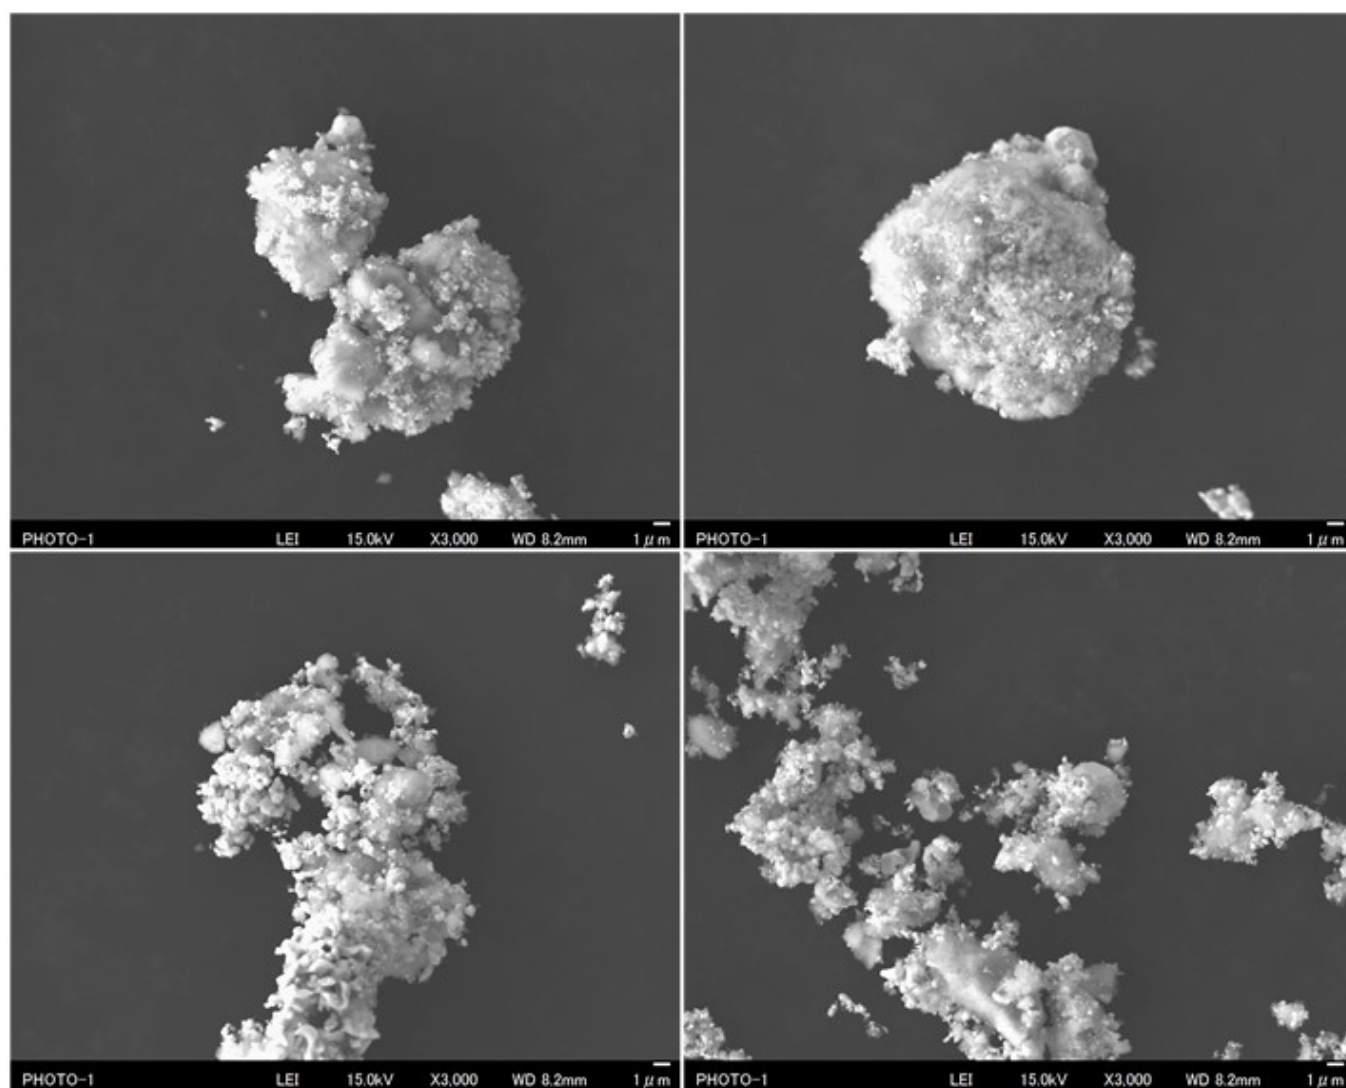

**Fig. S3** SEM images of CaPt<sub>2</sub>/ZrO<sub>x</sub>.

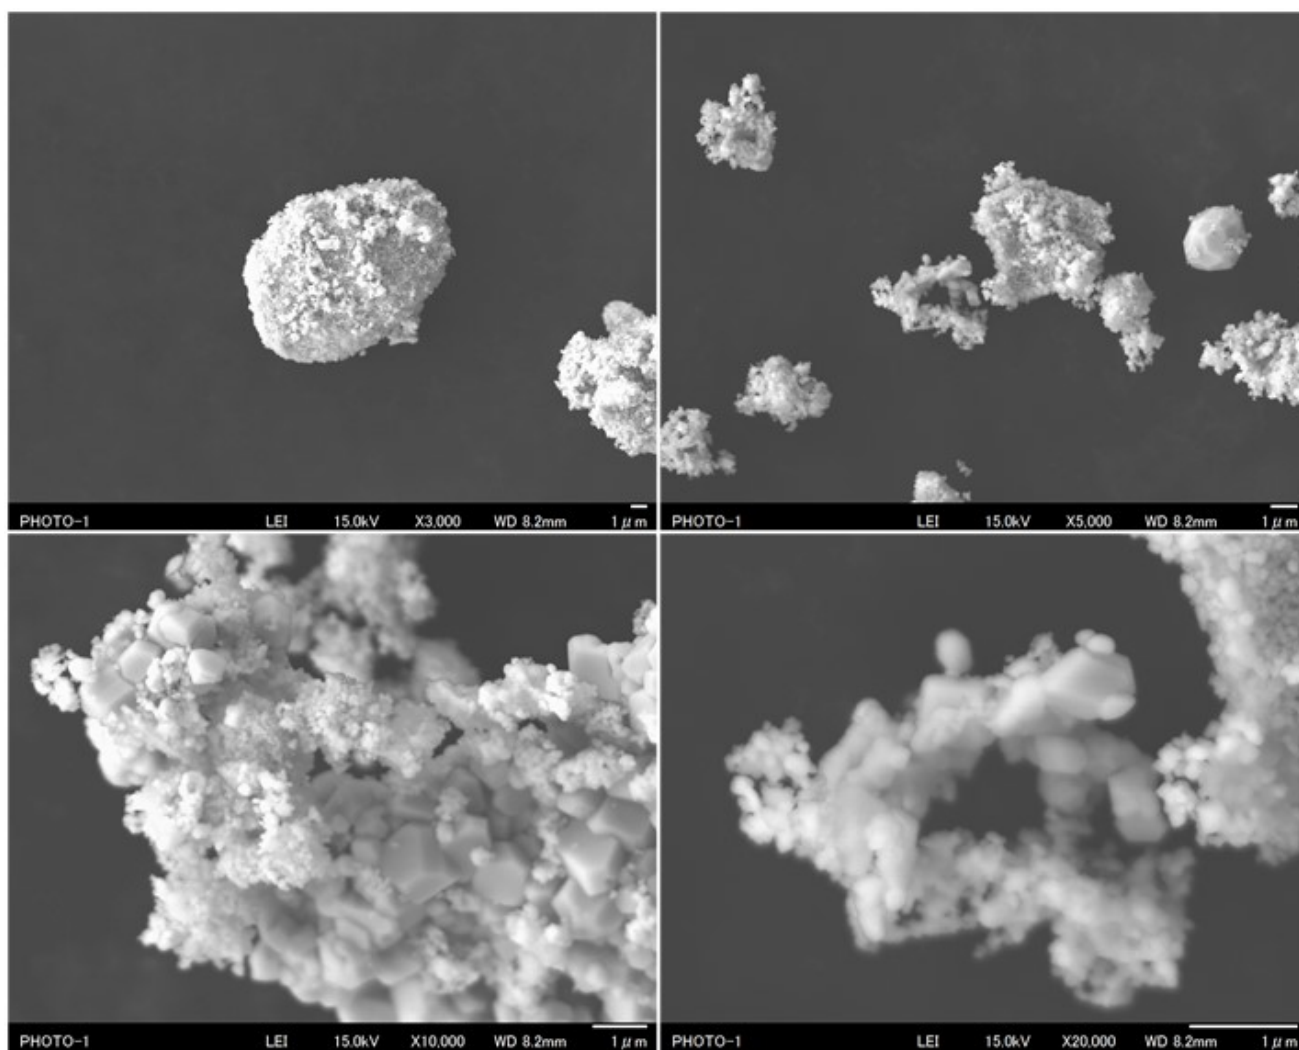

**Fig. S4** SEM images of CaPt<sub>2</sub>/HfO<sub>x</sub>.

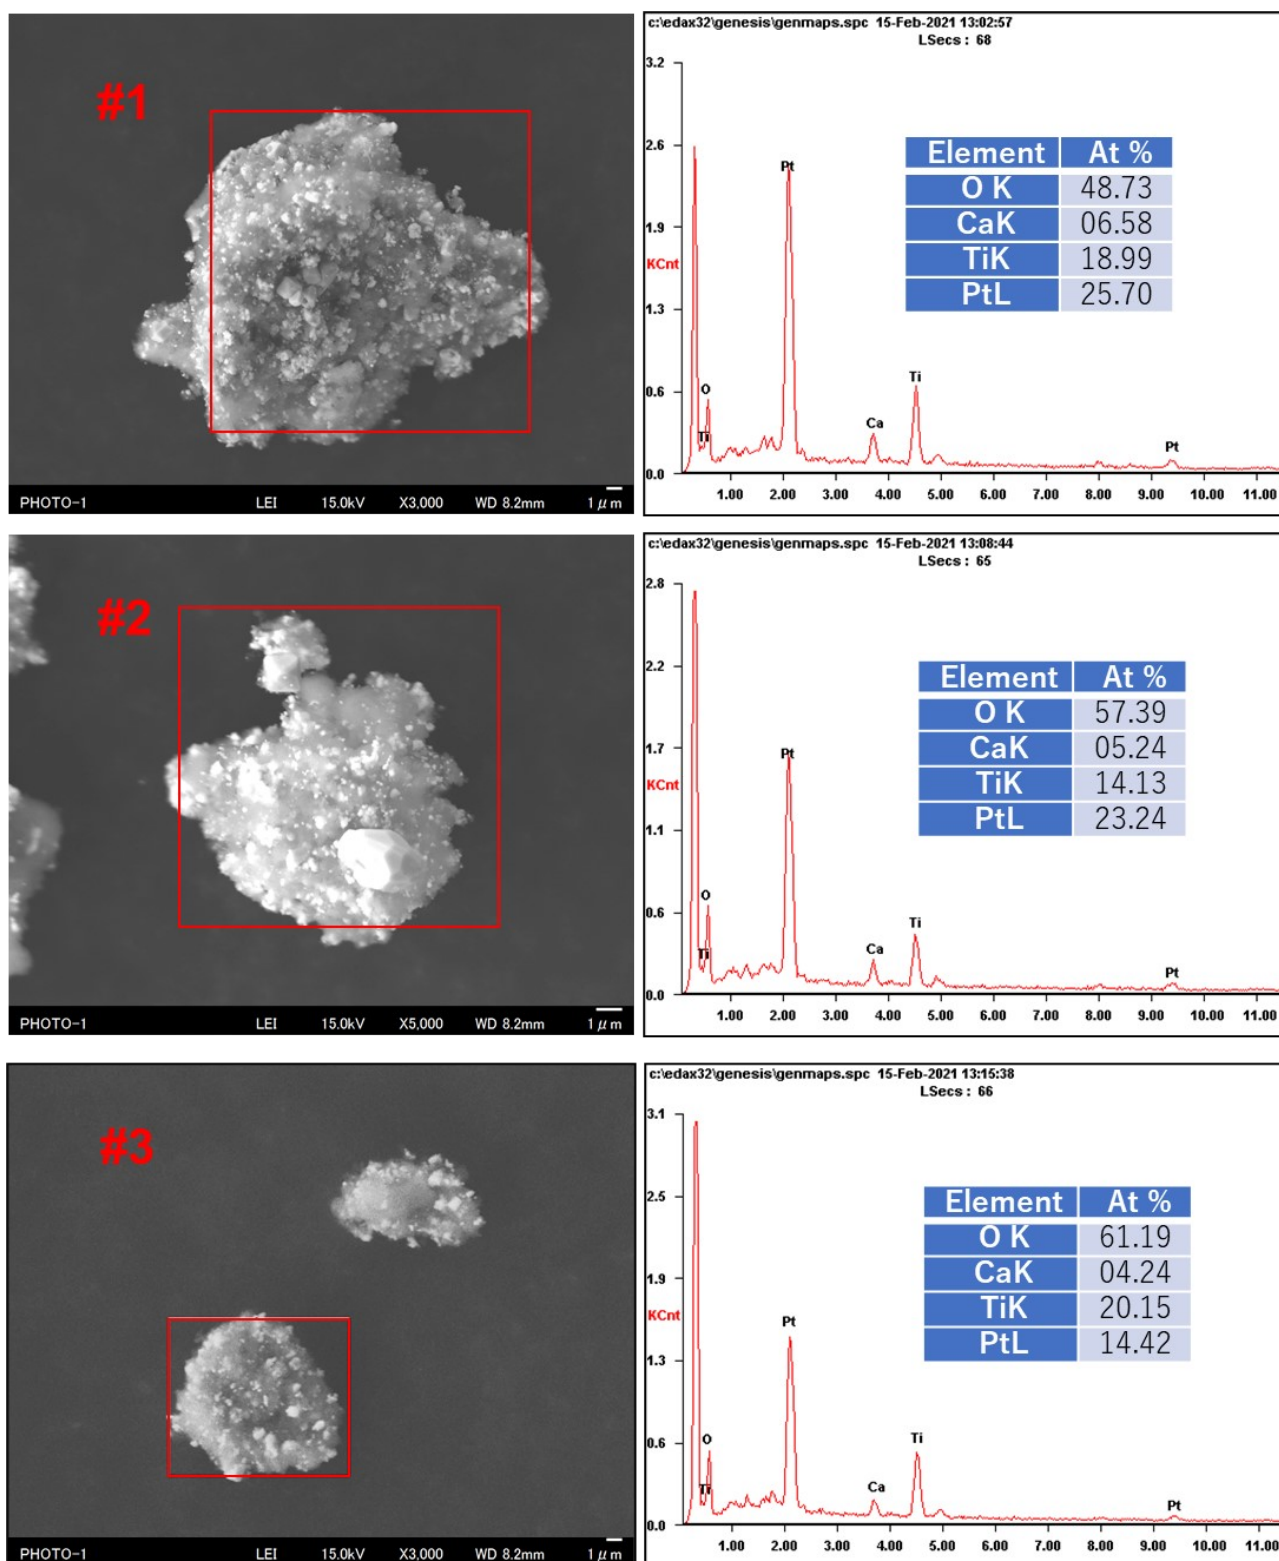

**Fig. S5** SEM-EDX of  $\text{CaPt}_2/\text{TiO}_x$  at different positions of #1-#3.



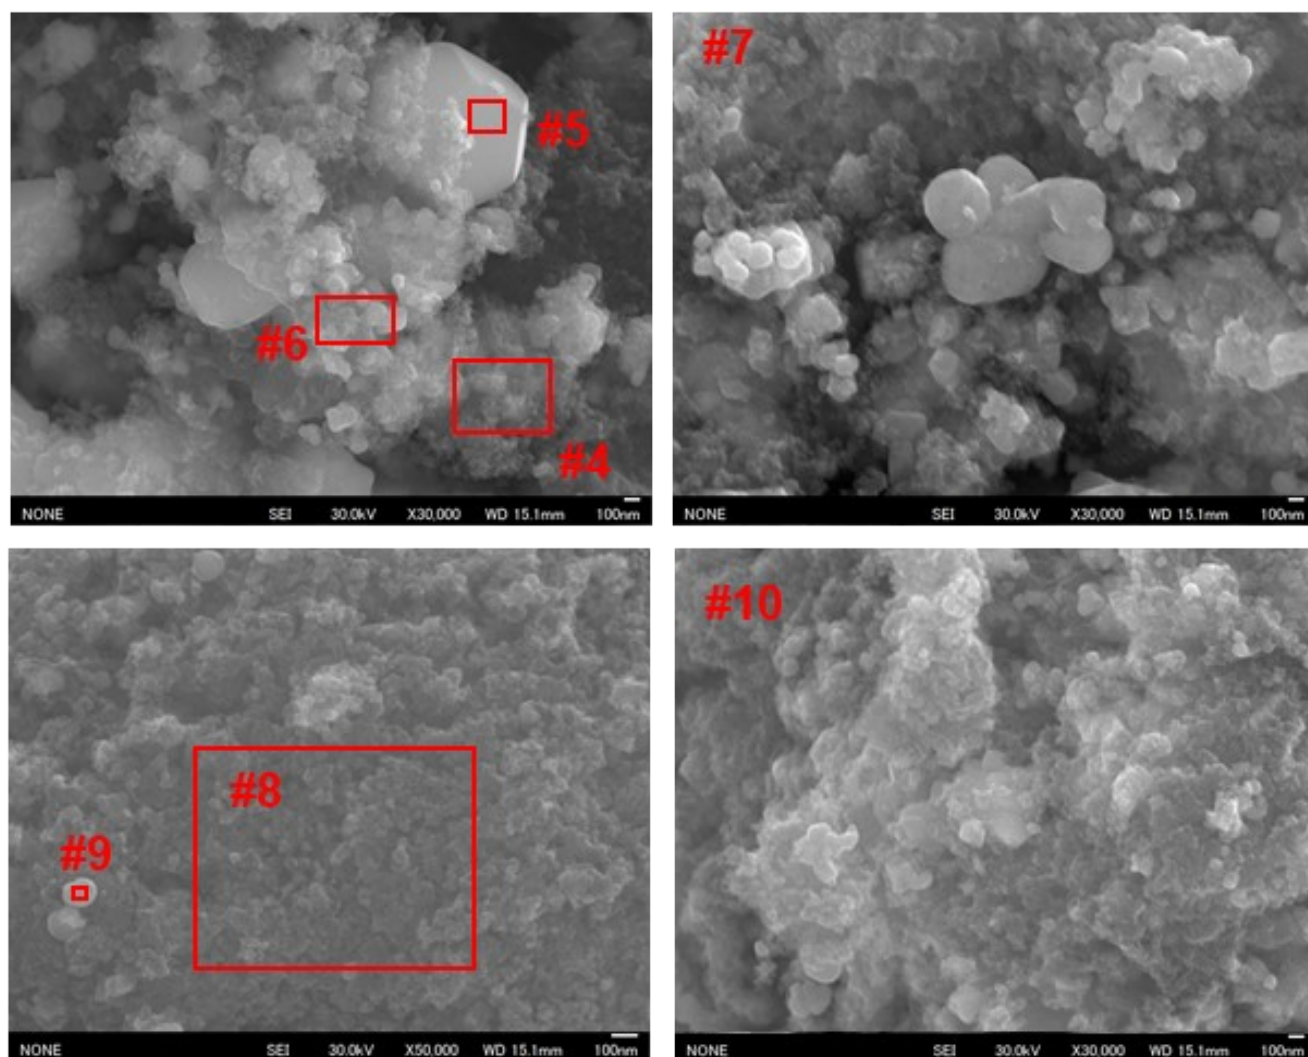

**Fig. S6** SEM-EDX of CaPt<sub>2</sub>/TiO<sub>x</sub> at different positions of #4-#10.

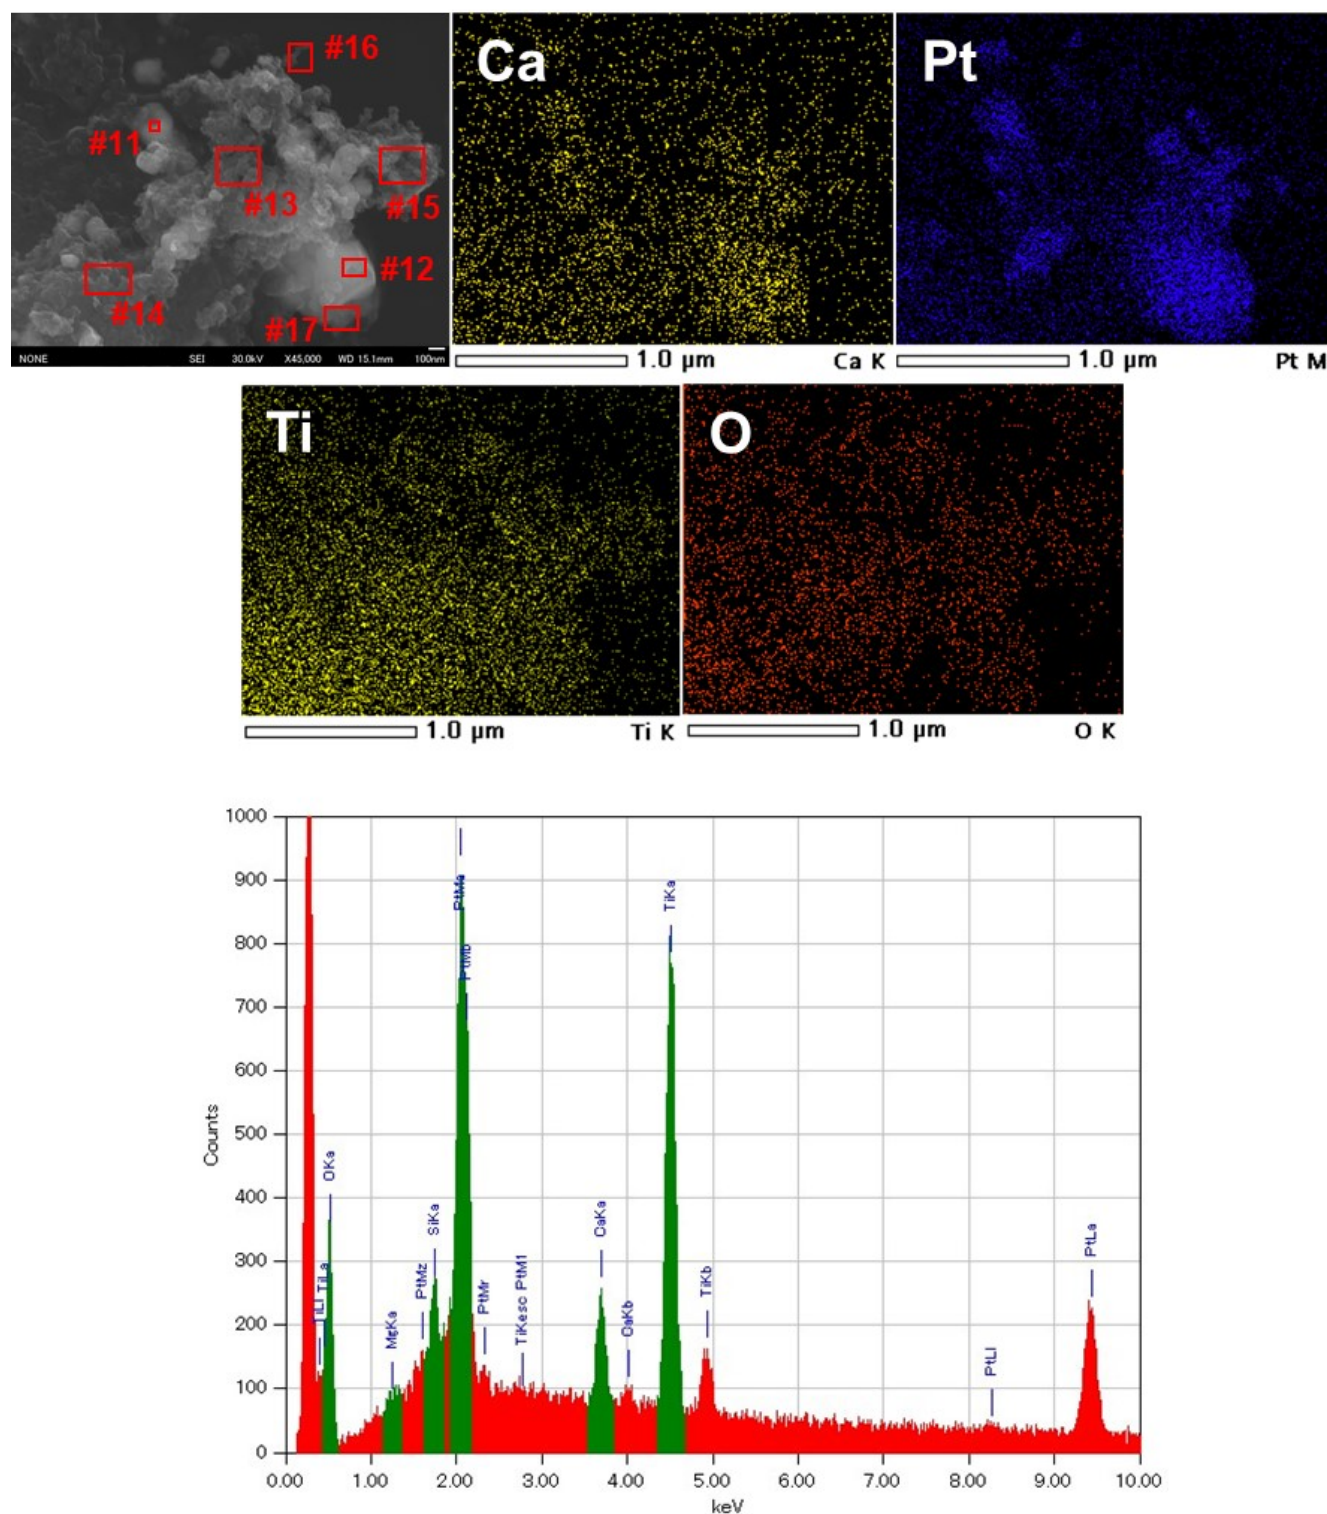

**Fig. S7** SEM-EDX of  $\text{CaPt}_2/\text{TiO}_x$  at different positions of #11-#17 and the elemental mappings.

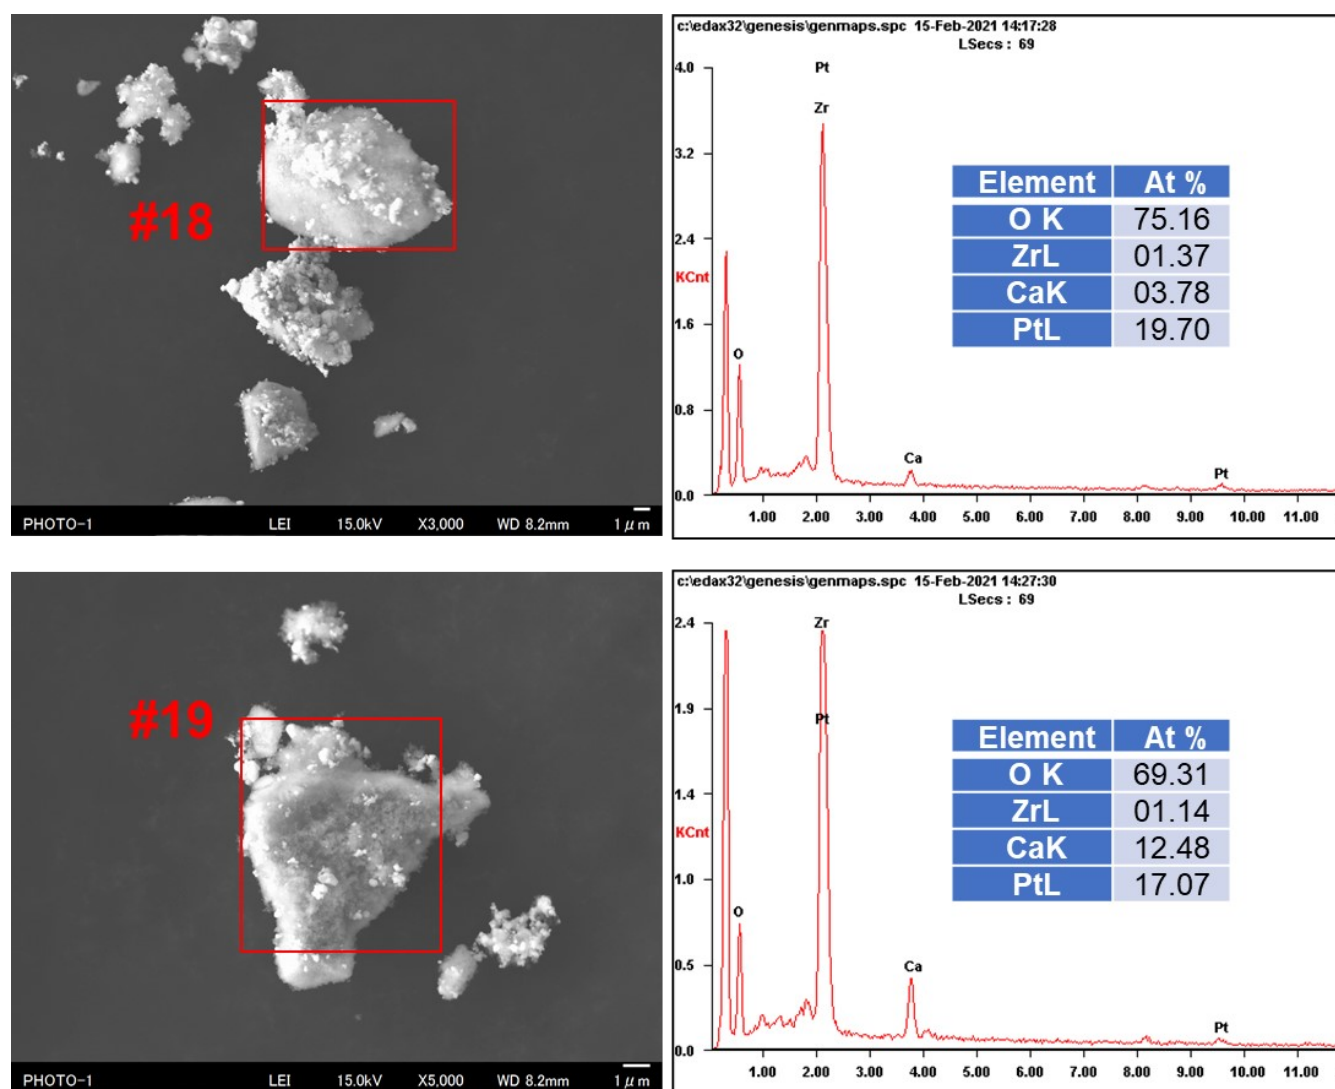

Fig. S8 SEM-EDX of  $\text{CaPt}_2/\text{ZrO}_x$  at different positions of #18 and #19.

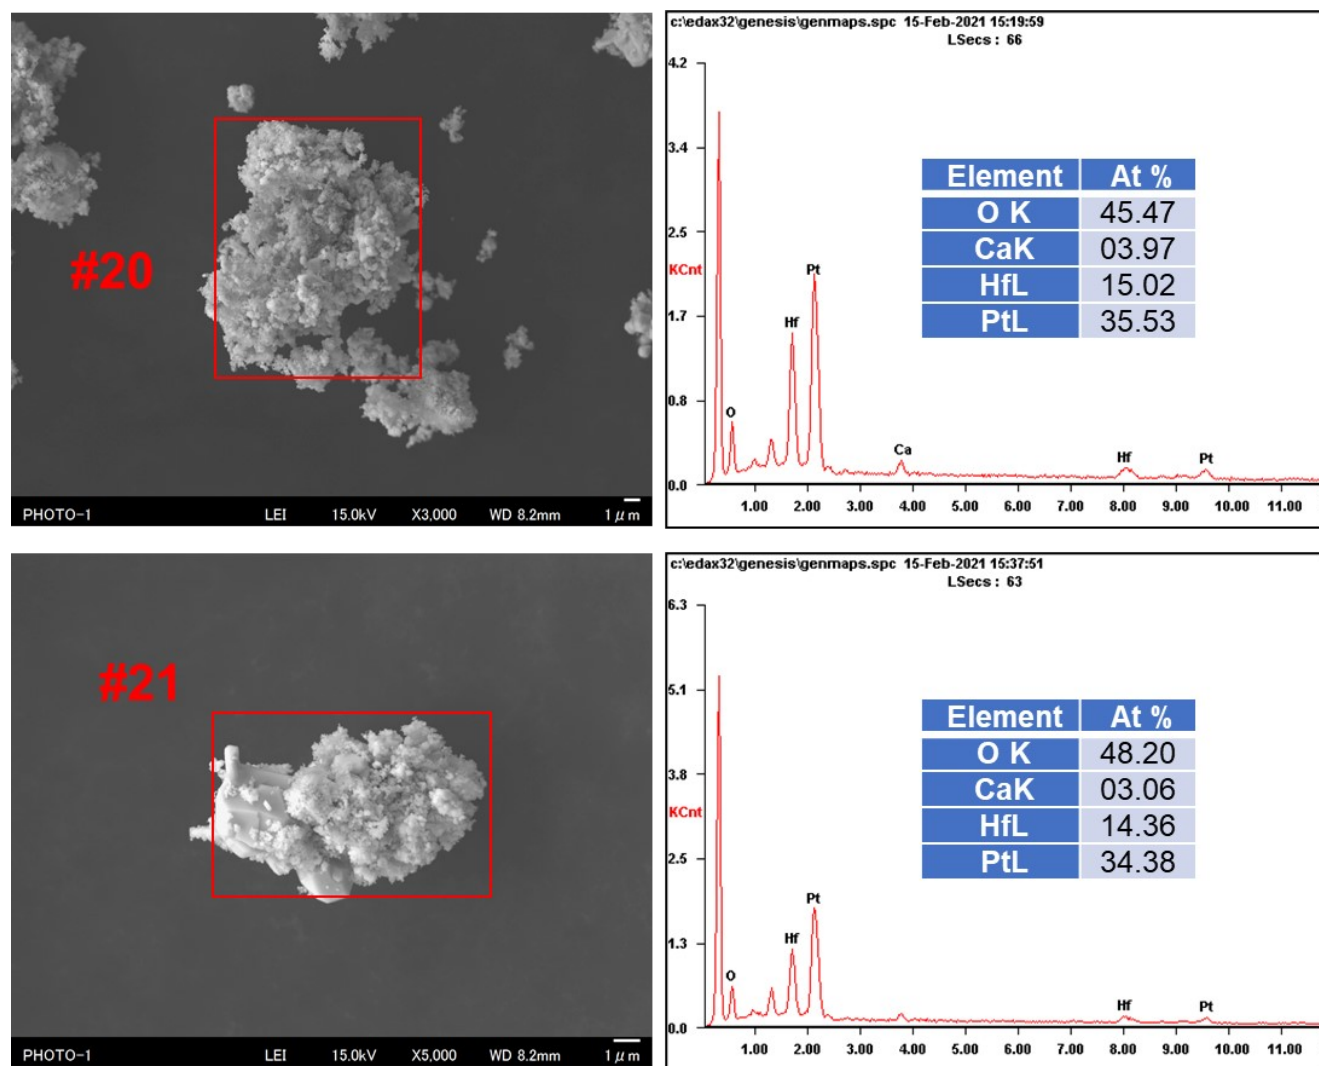

**Fig. S9** SEM-EDX of  $\text{CaPt}_2/\text{HfO}_x$  at different positions of #20 and #21.

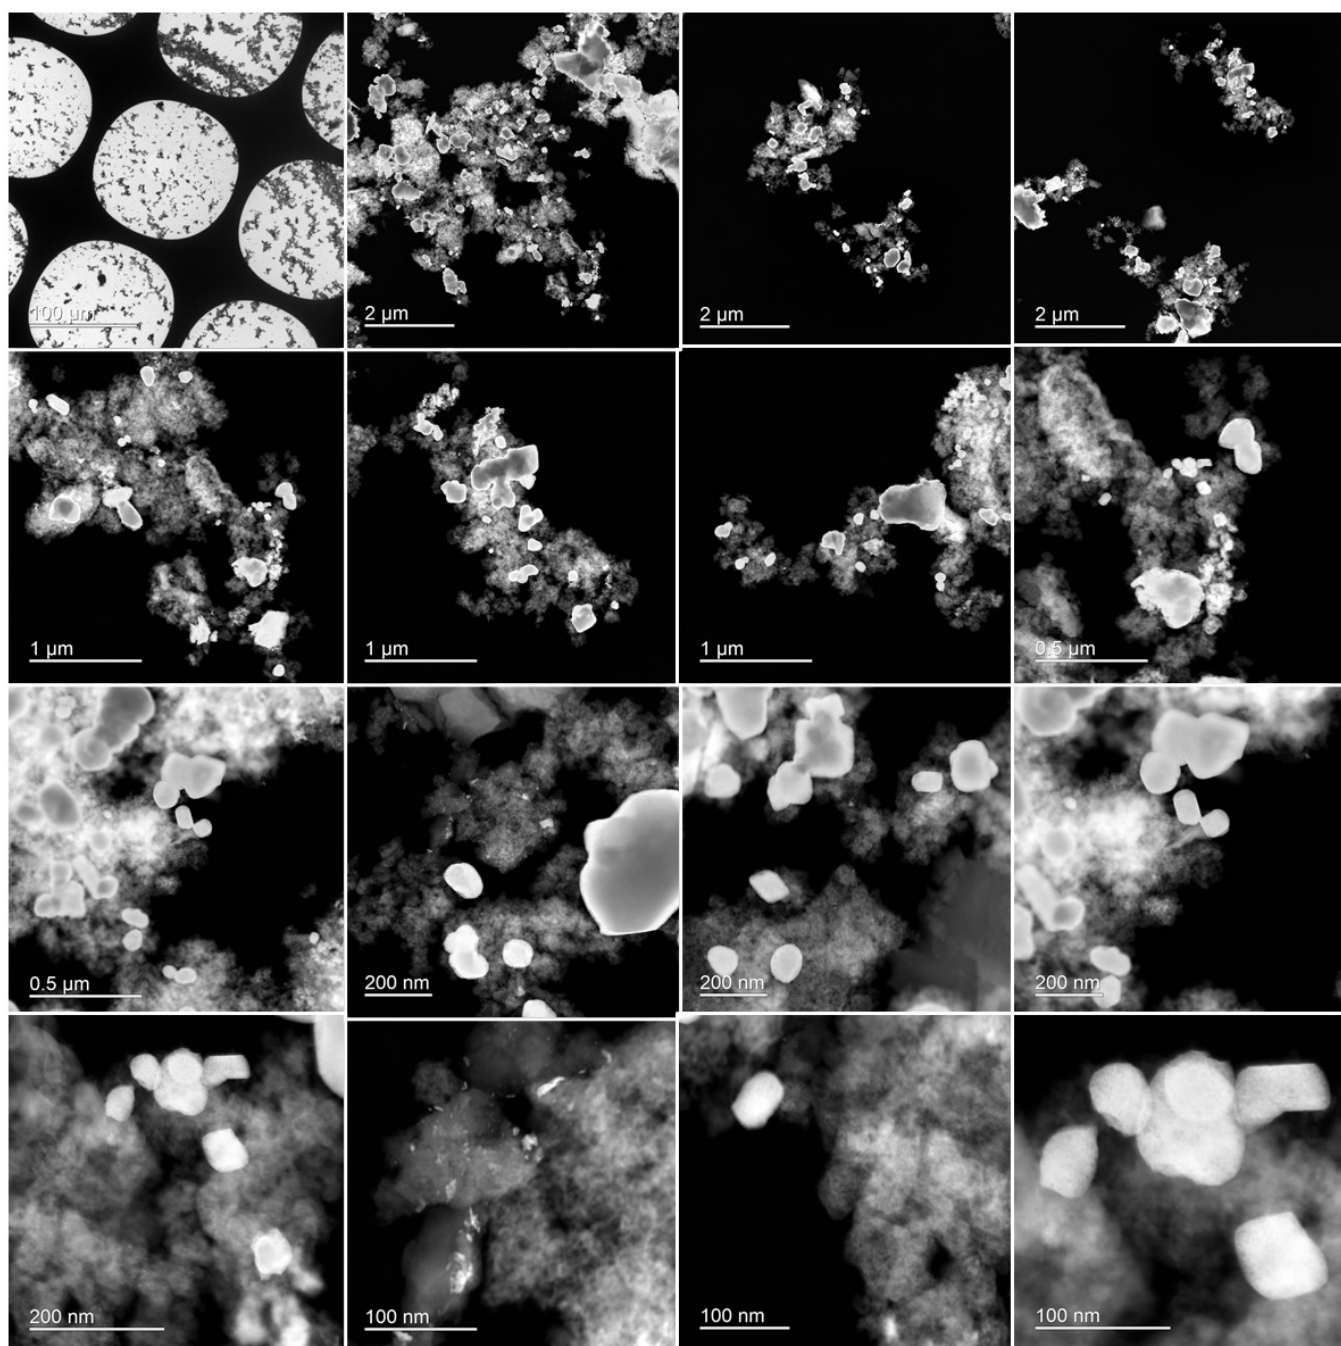

**Fig. S10** TEM images of  $\text{CaPt}_2/\text{TiO}_x$ .

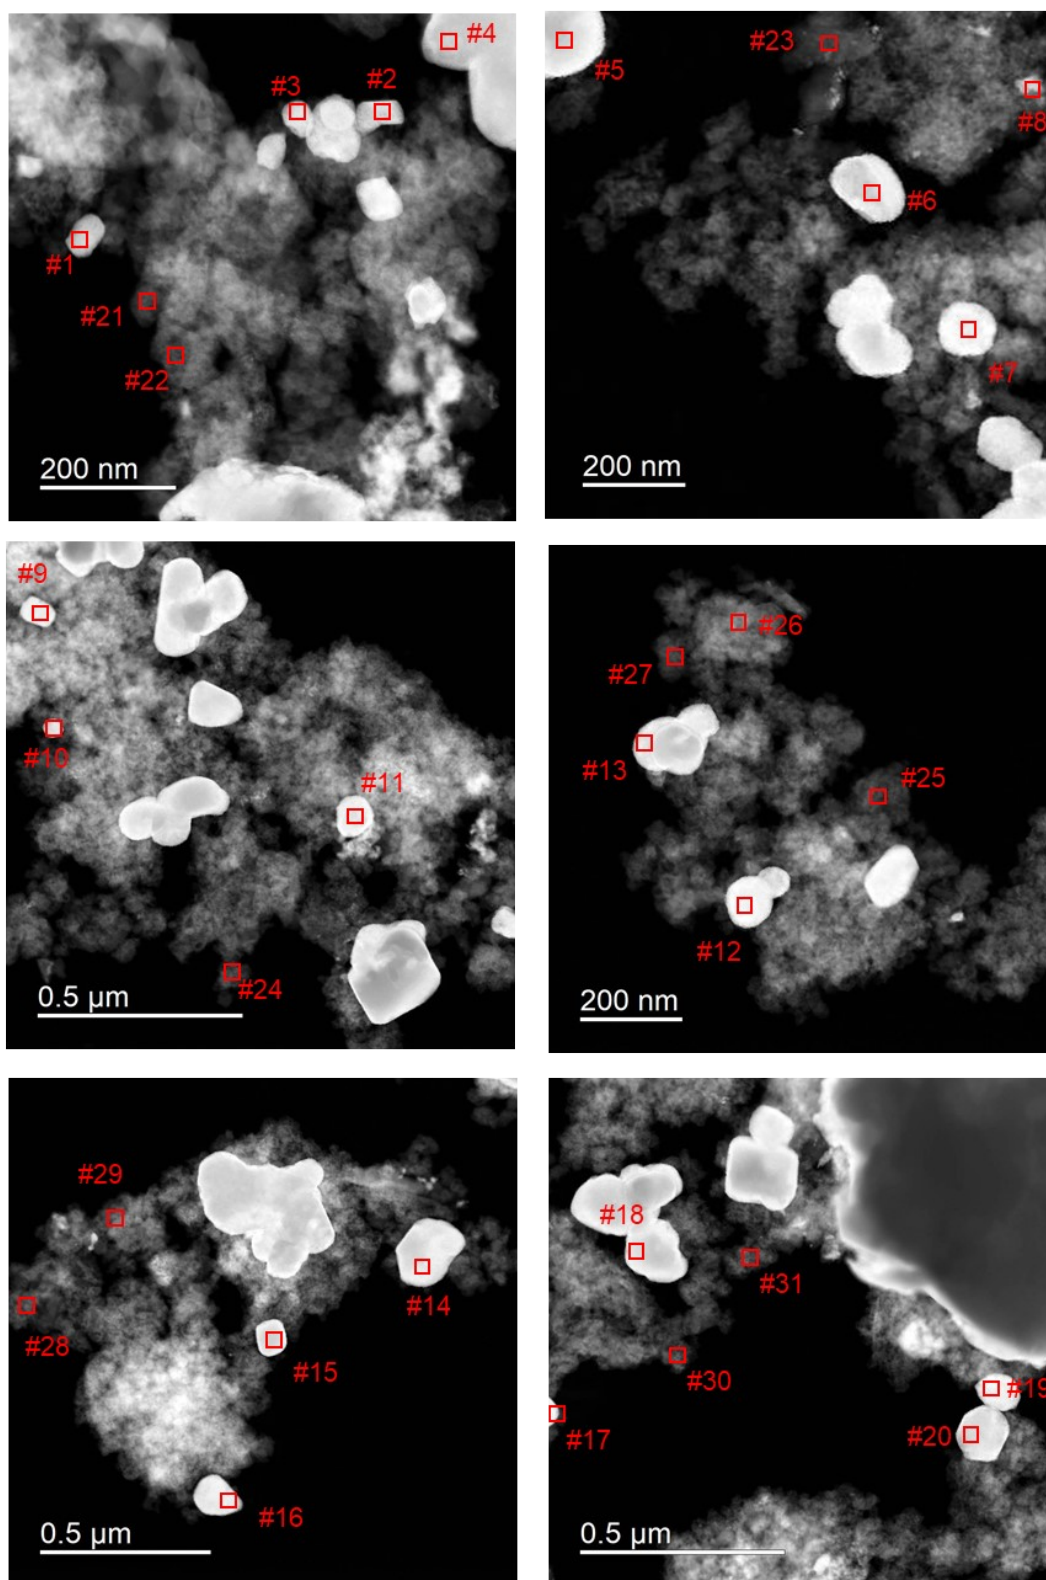

**Fig. S11** TEM-EDX of CaPt<sub>2</sub>/TiO<sub>x</sub> at different positions of #1-#31.

**Table S2** Summary of the molar ratios measured by SEM-/TEM-EDX for CaPt<sub>2</sub> supported on TiO<sub>x</sub>, ZrO<sub>x</sub> and HfO<sub>x</sub>.

| Sample                              | Molar ratio of main constituent elements [mol%] |          |      |      |              |      |      |
|-------------------------------------|-------------------------------------------------|----------|------|------|--------------|------|------|
|                                     | Measurement                                     | Position | Ca   | Pt   | Ti, Zr or Hf | O    |      |
| CaPt <sub>2</sub> /TiO <sub>x</sub> | SEM                                             | 1        | 6.6  | 25.7 | 19.0         | 48.7 |      |
|                                     |                                                 | 2        | 5.2  | 23.2 | 14.1         | 57.4 |      |
|                                     |                                                 | 3        | 4.2  | 14.4 | 20.2         | 61.2 |      |
|                                     |                                                 | 4        | 3.8  | 9.8  | 19.1         | 67.3 |      |
|                                     |                                                 | 5        | 3.9  | 24.8 | 15.2         | 56.2 |      |
|                                     |                                                 | 6        | 3.9  | 10.0 | 13.9         | 72.2 |      |
|                                     |                                                 | 7        | 7.9  | 21.5 | 15.1         | 55.4 |      |
|                                     |                                                 | 8        | 1.9  | 6.6  | 23.8         | 67.8 |      |
|                                     |                                                 | 9        | 2.3  | 7.2  | 17.8         | 72.7 |      |
|                                     |                                                 | 10       | 5.7  | 14.7 | 15.6         | 64.1 |      |
|                                     |                                                 | 11       | 4.7  | 10.9 | 7.8          | 76.6 |      |
|                                     |                                                 | 12       | 8.2  | 18.2 | 8.4          | 65.2 |      |
|                                     |                                                 | 13       | 1.3  | 2.9  | 9.4          | 86.4 |      |
|                                     |                                                 | 14       | 1.7  | 2.2  | 12.7         | 83.4 |      |
|                                     |                                                 | 15       | 1.2  | 3.6  | 10.1         | 85.2 |      |
|                                     |                                                 | 16       | 1.1  | 2.9  | 3.1          | 92.9 |      |
|                                     |                                                 | 17       | 5.7  | 12.9 | 11.4         | 70.1 |      |
|                                     | Pt-rich position                                | TEM      | 1    | 10.9 | 58.1         | 4.9  | 26.1 |
|                                     |                                                 |          | 2    | 15.2 | 71.2         | 3.1  | 10.5 |
|                                     |                                                 |          | 3    | 9.8  | 52.7         | 10.0 | 27.5 |
|                                     |                                                 |          | 4    | 18.7 | 72.2         | 1.9  | 7.3  |
|                                     |                                                 |          | 5    | 21.9 | 64.8         | 5.5  | 7.8  |
|                                     |                                                 |          | 6    | 23.9 | 66.4         | 1.1  | 8.6  |
|                                     |                                                 |          | 7    | 16.1 | 47.2         | 18.6 | 18.2 |
|                                     |                                                 |          | 8    | 1.4  | 7.6          | 45.4 | 45.6 |
|                                     |                                                 |          | 9    | 13.9 | 55.7         | 20.3 | 10.1 |
|                                     |                                                 |          | 10   | 11.4 | 59.6         | 22.2 | 6.9  |
|                                     |                                                 |          | 11   | 9.5  | 47.3         | 29.2 | 14.1 |
|                                     |                                                 |          | 12   | 11.6 | 46.8         | 19.3 | 22.4 |
|                                     |                                                 |          | 13   | 16.4 | 70.1         | 0.9  | 12.6 |
|                                     |                                                 |          | 14   | 13.9 | 64.6         | 14.4 | 7.0  |
| Ti-rich position                    | TEM                                             | 15       | 17.1 | 73.3 | 1.8          | 7.8  |      |
|                                     |                                                 | 16       | 16.5 | 74.0 | 3.5          | 6.1  |      |
|                                     |                                                 | 17       | 13.5 | 58.6 | 8.8          | 19.2 |      |
|                                     |                                                 | 18       | 19.0 | 70.4 | 3.5          | 7.2  |      |
|                                     |                                                 | 19       | 14.3 | 58.1 | 13.0         | 14.6 |      |
|                                     |                                                 | 20       | 18.8 | 71.5 | 1.4          | 8.3  |      |
|                                     |                                                 | 21       | 1.3  | 0.3  | 43.0         | 55.3 |      |
|                                     |                                                 | 22       | 1.0  | 0.2  | 45.6         | 53.2 |      |
|                                     |                                                 | 23       | 1.6  | 0.5  | 33.4         | 64.5 |      |
|                                     |                                                 | 24       | 2.7  | 0.4  | 68.6         | 28.3 |      |
|                                     |                                                 | 25       | 1.5  | 0.1  | 41.2         | 57.1 |      |
|                                     |                                                 | 26       | 2.1  | 0.1  | 39.5         | 58.3 |      |
|                                     |                                                 | 27       | 1.6  | 0.2  | 47.0         | 51.3 |      |
| 28                                  | 1.8                                             | 0.4      | 33.1 | 64.8 |              |      |      |
| 29                                  | 1.4                                             | 0.1      | 40.0 | 58.6 |              |      |      |
| 30                                  | 1.8                                             | 0.5      | 43.3 | 54.5 |              |      |      |
| 31                                  | 1.7                                             | 0.8      | 47.8 | 49.6 |              |      |      |

## COMMUNICATION

Journal Name

|                                     |     |    |      |      |      |      |
|-------------------------------------|-----|----|------|------|------|------|
| CaPt <sub>2</sub> /ZrO <sub>x</sub> | SEM | 18 | 3.8  | 19.7 | 1.4  | 75.2 |
|                                     |     | 19 | 12.5 | 17.1 | 1.1  | 69.3 |
| CaPt <sub>2</sub> /HfO <sub>x</sub> | SEM | 20 | 4.0  | 35.5 | 15.0 | 45.5 |
|                                     |     | 21 | 3.1  | 34.4 | 14.4 | 48.2 |



**Table S3** Catalytic performances of commercial Pt/C and CaPt<sub>2</sub>/TiO<sub>x</sub> in hydrogenation of ketones to alcohols.

| Catalyst                            | Catalyst weight [mg] | Reactant      | Time [h] | Yield <sup>a)</sup> [%] | Reaction rate [ $\times 10^{-6}$ mol/s/g-cat] | Adsorbed amount of CO [cm <sup>3</sup> /g-cat] | Number of active site <sup>b)</sup> [ $\times 10^{19}$ g-cat <sup>-1</sup> ] | TOF [s <sup>-1</sup> ] |
|-------------------------------------|----------------------|---------------|----------|-------------------------|-----------------------------------------------|------------------------------------------------|------------------------------------------------------------------------------|------------------------|
| Pt/C                                | 3.5                  | cyclohexanone | 4        | 9                       | 2.63                                          | 1.99                                           | 5.35                                                                         | 0.030                  |
|                                     |                      | cyclohexanone | 8        | 12                      | 1.75                                          |                                                |                                                                              | 0.020                  |
|                                     |                      | cyclohexanone | 12       | 16                      | 1.56                                          |                                                |                                                                              | 0.018                  |
|                                     |                      | cyclohexanone | 16       | 27                      | 1.97                                          |                                                |                                                                              | 0.022                  |
| CaPt <sub>2</sub> /TiO <sub>x</sub> | 7.5                  | cyclohexanone | 16       | 6                       | 0.20                                          | 0.02                                           | 0.06                                                                         | 0.190                  |
| CaPt <sub>2</sub> /ZrO <sub>x</sub> | 7.5                  | cyclohexanone | 8        | 6                       | 0.40                                          | 0.31                                           | 0.84                                                                         | 0.029                  |
|                                     |                      | cyclohexanone | 16       | 11                      | 0.37                                          |                                                |                                                                              | 0.026                  |
|                                     |                      | cyclohexanone | 24       | 17                      | 0.38                                          |                                                |                                                                              | 0.027                  |
|                                     |                      | cyclohexanone | 32       | 28                      | 0.47                                          |                                                |                                                                              | 0.034                  |
|                                     |                      | acetophenone  | 16       | 8                       | 0.27                                          |                                                |                                                                              | 0.019                  |
| CaPt <sub>2</sub> /HfO <sub>x</sub> | 7.5                  | cyclohexanone | 16       | 6                       | 0.20                                          | 0.01                                           | 0.01                                                                         | 0.84                   |

a) H-NMR yield using 1,3,5-trimethoxybenzene as an internal standard.

b) Calculated with an assumption that a CO molecule adsorbed on an active site.

**Table S4** Comparison of TOFs obtained with Pt-based catalysts in hydrogenation of ketones to alcohols.

| Catalysts                              | Reactant      | H <sub>2</sub> pressure [MPa] | Temperature [°C] | TOF [s <sup>-1</sup> ] | ref.      |
|----------------------------------------|---------------|-------------------------------|------------------|------------------------|-----------|
| Pt/C                                   | cyclohexanone | 0.1                           | R.T.             | 0.02-0.03              | This work |
| CaPt <sub>2</sub> /TiO <sub>x</sub>    | cyclohexanone | 0.1                           | R.T.             | 0.19                   |           |
| CaPt <sub>2</sub> /ZrO <sub>x</sub>    | cyclohexanone | 0.1                           | R.T.             | 0.03                   |           |
|                                        | acetophenone  | 0.1                           | R.T.             | 0.02                   |           |
| CaPt <sub>2</sub> /HfO <sub>x</sub>    | cyclohexanone | 0.1                           | R.T.             | 0.84                   |           |
| Pt(0) catalyst                         | cyclohexanone | 0.6                           | 75               | 0.26                   | [1]       |
| Pt/MCM-41                              | acetophenone  | 0.1                           | R.T.             | 0.04-0.15              | [2]       |
| Pt-Fe nanocubes                        | acetophenone  | 0.1                           | 70               | 0.29                   | [3]       |
| Pt-Fe nanowires                        | acetophenone  | 0.1                           | 70               | 1.63                   |           |
| 0.78%Pt/Al <sub>2</sub> O <sub>3</sub> | acetophenone  | 0.09                          | 100              | 104000                 | [4]       |
| 0.95%Pt/TiO <sub>2</sub>               | acetophenone  | 0.09                          | 100              | 63000-2400000          |           |

### References

1. M. J. Jacinto, R. Landers, and L. M. Rossi, *Catal. Comm.*, 2009, **10**, 1971.
2. Z. Wang, K.-D. Kim, C. Zhou, M. Chen, N. Maeda, Z. Liu, J. Shi, A. Baiker, M. Hunger, and J. Huang, *Catal. Sci. Technol.*, 2015, **5**, 2788.
3. W. Wu, J. Li, Z. Chen, W. Chen, H. Pang, K. Ma, and J. Zeng, *J. Catal.*, 2019, **373**, 209.
4. S. D. Lin, D. K. Sanders, and M. A. Vannice, *J. Catal.*, 1994, **147**, 370.
